# Supplementary material for: Gathering pipeline methane emissions in Fayetteville shale pipelines and scoping guidelines for future pipeline measurement campaigns
Source: Oxford University Press journal article supplement (doi:10.1525/elementa.258), 2017-01-01
Supplement: elementa-5-258-s1.docx [file elementa-5-258-s1.docx]

***Supplemental Material for***

**Gathering pipeline methane emissions in Fayetteville shale pipelines and scoping guidelines for future pipeline measurement campaigns.**

Daniel J. Zimmerle a*, Cody K. Pickering a, Clay S. Bell a, Garvin A. Heath b, Dag Nummedal e Gabrielle Pétron c,d, Timothy L. Vaughn a

a Colorado State University, Energy Institute and Mechanical Engineering, 430 N College, Fort Collins, CO 80524, USA

b National Renewable Energy Laboratory, 15013 Denver West Parkway, Golden, CO 80401, USA

c University of Colorado Boulder, Cooperative Institute for Research in Environmental Sciences, 216 UCB, Boulder, CO 80309, USA

d NOAA Earth System Research Laboratory, 325 Broadway, Boulder, CO 80305, USA

e Colorado School of Mines, 1500 Illinois Street, Golden CO 80401, USA

*email: dan.zimmerle@colostate.edu

24 Pages

21 Figures

4 Tables

Accompanying data table in Excel Spreadsheet

# Acknowledgements

Funding for this work was provided by RPSEA/NETL contract no 12122-95/DE-AC26-07NT42677 to the Colorado School of Mines and substantial state cost-share through the Colorado Energy Research Collaboratory (a consortium of the Colorado School of Mines, Colorado State University, the University of Colorado Boulder and the National Renewable Energy Laboratory). The National Oceanic and Atmospheric Administration provided significant in-kind support and funding from the NOAA Climate Program Office grant NA14OAR4310142. In kind support was received through the National Science Foundation AirWaterGas Sustainability Research Project (Cooperative Agreement No. CBET-1240584). This study was also supported by substantial additional financial, data and/or site access contributions by Southwestern Energy, XTO Energy, a subsidiary of ExxonMobil, Chevron, Statoil and the American Gas Association. Additional data and/or site access was provided by CenterPoint, Enable, Kinder Morgan, and BHP Billiton.

Contents

[Acknowledgements 2](#_Toc495844511)

[Table of Figures 3](#_Toc495844512)

[Table of Tables 4](#_Toc495844513)

[S1 Description of Gathering Lines and Auxiliary Equipment 5](#_Toc495844514)

[S2 Study Area Definition and Pipeline Selection 7](#_Toc495844515)

[S2.1 Measuring Rights of Way (ROWs) 8](#_Toc495844516)

[S3 Measurement Equipment used in Study 10](#_Toc495844517)

[S3.1 Vehicle Measurement System (VMS) Efficacy 11](#_Toc495844518)

[S3.2 High Flow Uncertainty for Underground Leaks 12](#_Toc495844519)

[S4 Measurement & Modeling Methods 13](#_Toc495844520)

[S4.1 Measurement Methods 13](#_Toc495844521)

[S4.2 Model Methods 13](#_Toc495844522)

[S4.3 Gathering Pipeline Emissions 14](#_Toc495844523)

[4.3.1 Pipeline Activity Count 14](#_Toc495844524)

[4.3.2 Modeling Emission Rate from Underground Pipeline Leaks 14](#_Toc495844525)

[4.3.3 Modeling the Frequency of Underground Pipeline Leaks 15](#_Toc495844526)

[S4.4 Auxiliary Equipment Counts and Emission Rates 17](#_Toc495844527)

[S4.5 Planned Episodic Emissions 18](#_Toc495844528)

[S4.6 Calculation of Comparable Estimates 20](#_Toc495844529)

[S5 Results & Study Comparisons 23](#_Toc495844530)

[S6 Estimating required size of gathering pipeline measurement campaigns 24](#_Toc495844531)

[References 26](#_Toc495844532)

## Table of Figures

[Figure S1: Schematic of natural gas industry sectors. 5](#_Toc495844487)

[Figure S2: A typical pig launcher/receiver from the study area. 6](#_Toc495844488)

[Figure S3: Schematic of a pigging procedure. 7](#_Toc495844489)

[Figure S4: Example is a small block valve typical of those found in gas gathering systems. 7](#_Toc495844490)

[Figure S5: Gathering system equipment including well locations and representative gathering pipelines from MapSearch™ data and partner GIS data. 8](#_Toc495844491)

[Figure S6: ROW with a steep slope, but mowed and relatively accessible. 9](#_Toc495844492)

[Figure S7: ROW with dense vegetation. 9](#_Toc495844493)

[Figure S8: Front bumper of the vehicle measurement system. 11](#_Toc495844494)

[Figure S9: VMS data near a pig launcher emitting 170 g CH4/h. 11](#_Toc495844495)

[Figure S10: VMS data near a pig launcher emitting 38 g CH4/h. 12](#_Toc495844496)

[Figure S11: Data flow in simulation model. 13](#_Toc495844497)

[Figure S12: Development of emission rate distribution for underground pipeline leaks. 15](#_Toc495844498)

[Figure S13: Satellite image surveys to determine auxiliary equipment counts. 17](#_Toc495844499)

[Figure S14: Cumulative distribution functions for block valves and pig launcher locations 18](#_Toc495844500)

[Figure S15: Venting of pig launcher chamber 19](#_Toc495844501)

[Figure S16: Scanned table from the GRI/EPA study report (GRI/EPA, 1996). 21](#_Toc495844502)

[Figure S17: Estimated lognormal distribution of emission rates from plastic pipelines. 21](#_Toc495844503)

[Figure S18: CDF's for pig launcher & block valve emissions 23](#_Toc495844504)

[Figure S19: Required survey size for ±30% confidence bound. 25](#_Toc495844505)

## Table of Tables

[Table S1 List of instrumentation used throughout the measurement campaign 10](#_Toc495844506)

[Table S2: Parameters for Pipeline Leak Emissions Distribution 14](#_Toc495844507)

[Table S3: Dates and Sizes of Pig Launcher Emissions 20](#_Toc495844508)

[Table S4: GHGRP Gathering Pipeline Emission Factors 21](#_Toc495844509)

[Table S5: Summary of simulation model results 24](#_Toc495844510)

# Description of Gathering Lines and Auxiliary Equipment

Gathering pipelines and auxiliary equipment transport gas from the natural gas production pads to transmission or distribution systems. Gathering lines exist in two distinct groups (see Figure S1):

1. Suction: Pipeline infrastructure between the exit meter at the production well pads and the entrance valve or piping at the gathering station(s).
2. Discharge: Pipeline infrastructure between gathering stations and downstream processing plant or transmission or distribution system.

In the study area, pipelines between the well pads and gathering stations are a mix of polyethylene and steel, and those between gathering stations and downstream sales points are steel.


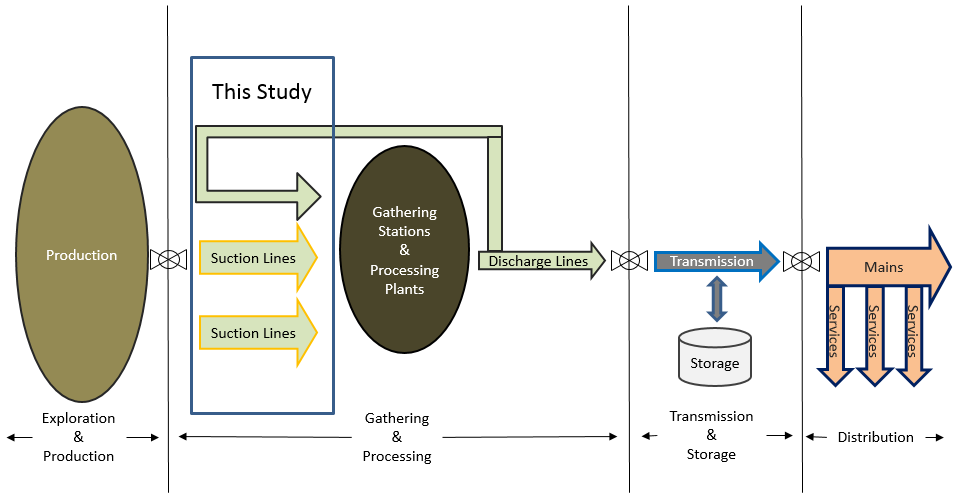


Figure S1: Schematic of natural gas industry sectors.

Sectors are separated by lines and gas flow is indicated with arrows.

In addition to pipelines, two types of auxiliary equipment are also installed on study partners’ systems in the study area – pig launchers or receivers and block valves. Pig launchers and pig receivers (Figure S2) are nearly identical components, but installed in different orientations to launch or receive the pig. For simplicity, both types are called pig launchers in this study.


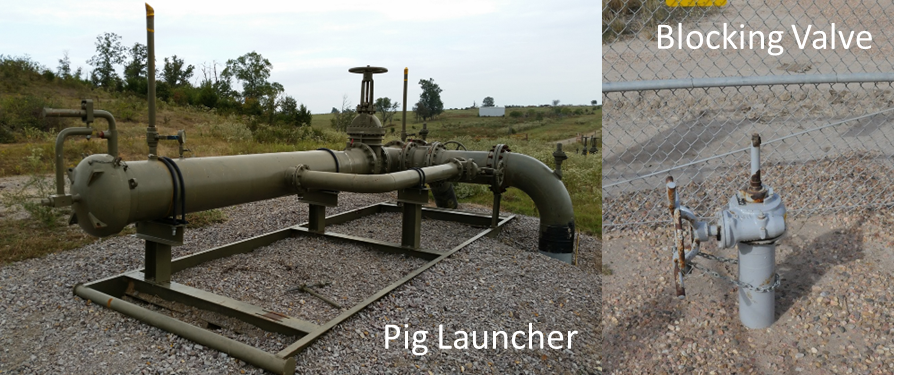


Figure S: A typical pig launcher/receiver from the study area.

Door or hatch to the pig launcher can be seen on the left side of the image.

Operators pig lines when flow rates decrease, or pressures change in the line or in nearby connected facilities. A “pig” is a cleaning plug pushed through the pipeline by the gas flow in the pipeline. To insert a pig, or to remove a pig and any debris cleaned from the line, operators must depressurize the pig launcher, releasing gas to the atmosphere (Figure S3). At times, the pig doesn’t travel the intended route, and operators may have to open and check several launchers and receivers to locate the pig. Since transmission systems handle market-quality gas and very high pressures, operators purge pigging equipment extensively to prevent air contamination. In contrast, gathering gas has not been upgraded, and operators release relatively less gas to purge pigging equipment.

Block valves are used to stop the flow of gas in a pipeline or change direction of flow. Figure S4 shows a block valve. In general, block valves are simpler than pig launchers, with fewer gauges, flanges, and valves, reducing potential sources for fugitive emissions.

Both block valves and pig launchers have multiple flanges, gauges, and valves that have the potential to be sources for fugitive methane emissions. Pig launchers also have doors/hatches that are used to insert the pig. Emissions can be found at any of these interfaces, and multiple leaks may be detected at a given auxiliary equipment location.


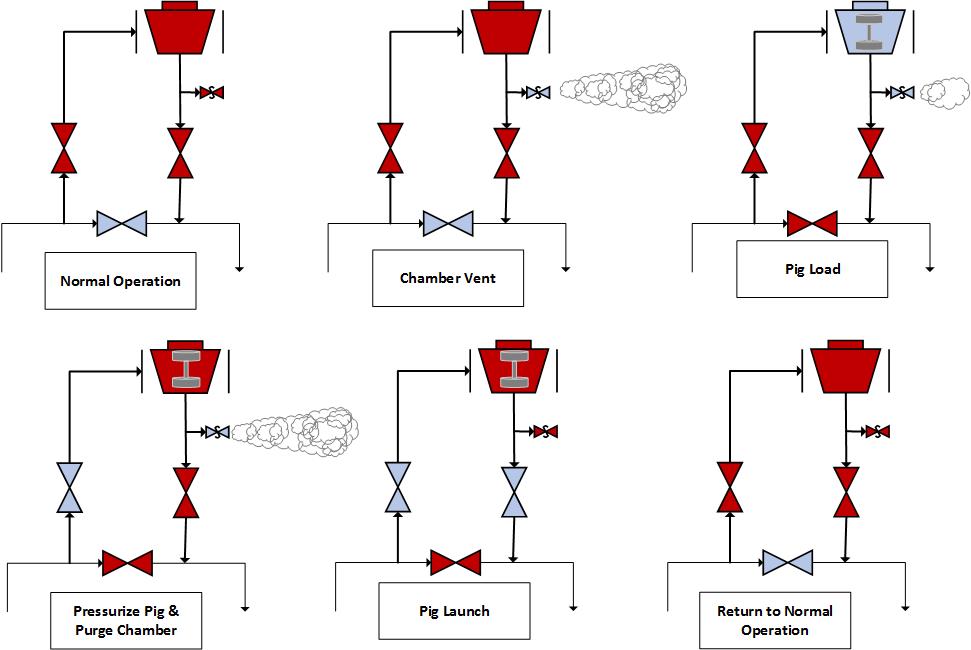


Figure S3: Schematic of a pigging procedure.

Schematics describe the gas flows during normal operation, loading and launching a pig. Gas releases occur to vent the launcher/receiver chamber, and are largely determined by the pipeline pressure and the size of the pigging equipment. Light blue indicates open valve with gas flowing through it, red indicates closed valve that is preventing gas flow.


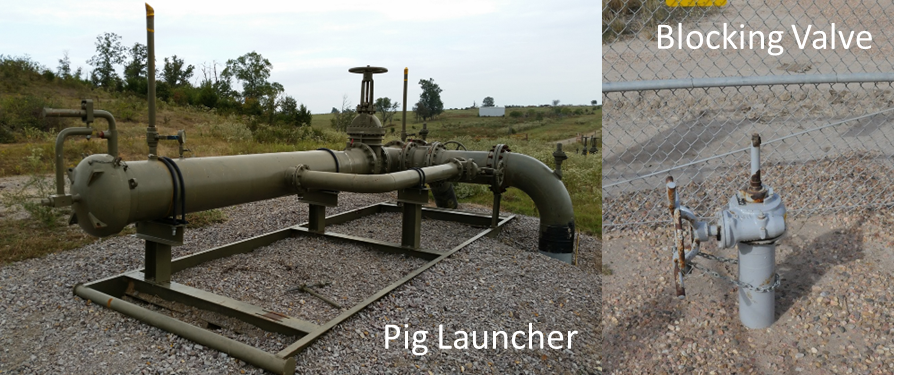


Figure S: Example is a small block valve typical of those found in gas gathering systems.

(Photo not from study area).

# Study Area Definition and Pipeline Selection

During the field campaign, different sections of gathering line were randomly chosen to characterize the emissions from gathering lines. The study area is defined as shown in the main paper, Figure 1. Pipeline maps were not available for the entire basin. However, some maps were available, and to illustrate the complexity of the gathering system, Figure S5 shows a region where pipeline data were available for both study partners, although some data shown were acquired in 2010, and likely does not reflect extensions made since then.

Figure S: Gathering system equipment including well locations and representative gathering pipelines from MapSearch™ data and partner GIS data.

Pipelines have been colored randomly to maintain privacy of partner and non-partner companies. Not all wells are connected to gathering pipelines due to incomplete gathering pipeline information.

## Measuring Rights of Way (ROWs)

Selection of ROWs to measure was guided by both experimental guidelines and physical limitations. The measurement team chose a geographical region to focus each day. Operators would provide options for drivable ROWs and measurement contractor randomly selected which ROWs to traverse. A ROW could be excluded for one or more of the reasons stated in the main paper. Pipeline segments included ROWs that were both near towns and rural. To maximize coverage, 2-3 segments of traversable ROW were selected at the start of each day. Figure S6 & Figure S7 illustrate the range of vegetation on typical ROWs in the study area.

Figure S: ROW with a steep slope, but mowed and relatively accessible.


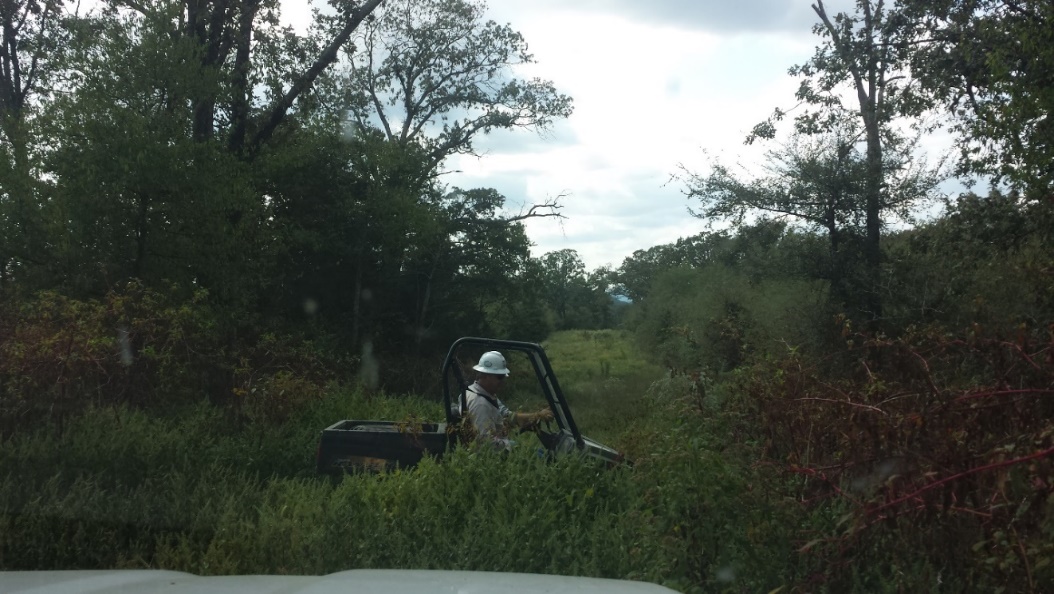


Figure S7: ROW with dense vegetation.

Rocks, ditches, fallen trees and other obstacles existed in this ROW, but are not apparent in the photo.

# Measurement Equipment used in Study

All measurements were performed by GHD, an engineering services company, using measurement devices owned by GHD and calibrated by GHD employees as specified in the instrument manuals. An instrument list is in Table S1. The team had available several gas concentration instruments, and swapped between instruments if concentrations were outside the measurement range of the instrument they were using. Measurement methods follow those used in Lamb et al.(Lamb et al., 2015) for distribution pipelines, and the same team made the measurements here as in that study.

Table S List of instrumentation used throughout the measurement campaign

| ***Manufacturer*** | ***Instrument*** | ***Model Number*** | ***Sensitivity*** | ***Use*** | ***Serial Number*** |
| --- | --- | --- | --- | --- | --- |
| Heath Consultants | RMLD-IS | RMLD-IS | Methane  0-15 m: 5 ppm-m 15-30 m: 10 ppm-m | Underground pipeline leak delineation/detection | 8101311001 |
| Heath Consultants | DP-IR | DP-IR | Methane  0-1000 ppm: 1 ppm 1000-10,000 ppm: 5 ppm  1-100% Gas: 0.5% | Underground Leak Delineation | 91013-40001 |
| Bascom-Turner | Gas Sentry | CGI-211 | Natural Gas  ± 2% of reading | High Flow Gas Concentrations  Aboveground / Underground leak measurements | 0302-014091 |
| 9935-011256 |
| 9614-007683 |
| 9614-006789 |
| 9532-5118 |
| TSL | VelociCheck | 8340 | Air velocity  0-10 m/s | High Flow Gas Flow Rate  Aboveground / Underground leak measurements | 96030356 |
| 5% of reading or ± 0.025 m/s | 95040139 |
| whichever is greater | 96030360 |
| INDACO | High-Flow | BT-GCI-211 | Detection limit: 100 ppmv | High flow measurements | - |
| TSL- 8340 | See Lamb et al 2015, S3.1 |
| Los Gatos Instruments | Ultra-Portable GHG Analyzer | 915-0011 | Methane  Precision: <2 ppb Range: 0.01 - 100 ppm | Gathering pipeline leak screening (mobile ambient measurements) | - |
|
| Geneq Inc. | GPS | Sx Blue | N/A | Ambient Monitor Position | - |

GHD’s vehicle measurement system (VMS) was designed to detect methane emissions close to the ground using bumper-mounted air intakes with four inlets (see Figure S8). The four inlets were joined together and routed to the Los Gatos analyzer.


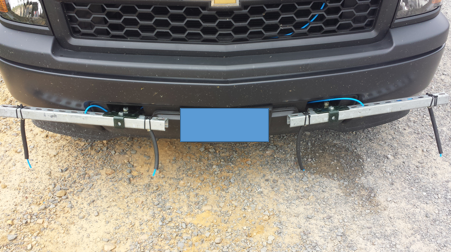


Figure S: Front bumper of the vehicle measurement system.

Bracket mounts 4 intake hoses that are flexible and designed to ride low to the ground.

## Vehicle Measurement System (VMS) Efficacy

The validation for the VMS was performed as indicated in the main paper. A selection of 4 auxiliary equipment leaks was chosen for analysis. One is shown in Figure 2c, in the main paper, and Figure S9 & S10 provide two additional examples. For the leak locations analyzed, each facility shows clearly elevated concentrations detectable by the VMS.

Figure S: VMS data near a pig launcher emitting 170 g CH4/h.


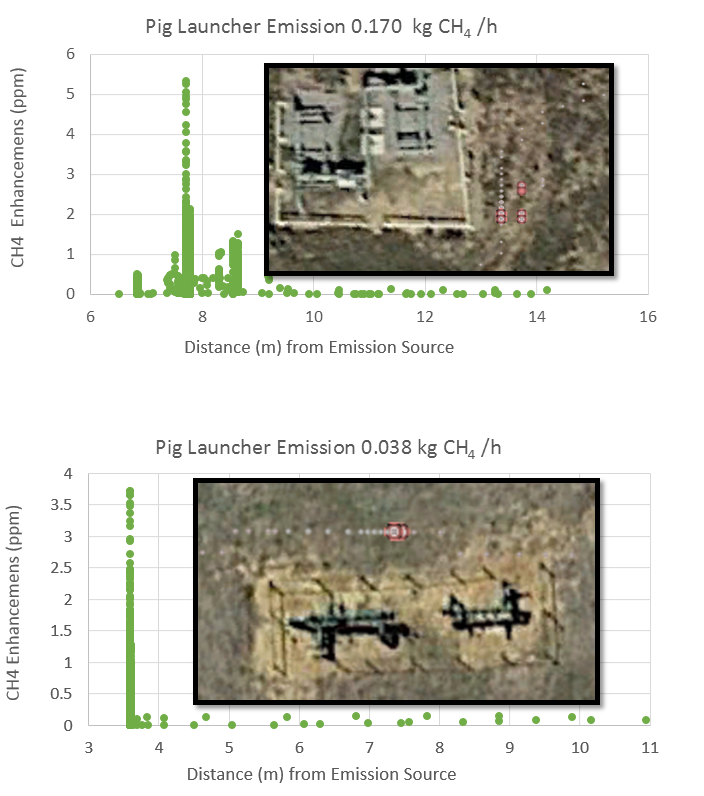


Figure S: VMS data near a pig launcher emitting 38 g CH4/h.

The VMS will only sense elevated concentrations that are within its travel path. It is therefore necessary that emissions from an underground leak be present within the driving path of the VMS to be detected. All gathering pipeline is buried in the study area. Digging operations disturb soil where the pipeline is buried, but typically do not disturb soil for more than a meter from the pipeline centerline. During burial operations, trenches are typically filled with soil of consistent origin. The combination of lack of soil disturbance, coupled with the uniform back fill, typically constrains underground emissions near the pipeline, although in exceptional cases, underground gas may find a preferential pathway away from the pipeline. Therefore, it is probable, but not guaranteed, that methane emissions from buried pipelines would likely surface inside the ROW, and likely directly above the ground disturbance when the pipeline was buried. The study team attempted to drive directly above the pipeline whenever possible to maximize the chance of detecting an underground leak.

During the campaign wind direction was not monitored. Therefore, the VMS could not be actively positioned downwind of the trench centerline. However, winds were light at ground level during the field campaign, reducing dilution or movement of the surface methane plume. The study team recommends that future pipeline measurement campaigns include a wind vane to identify wind direction.

## High Flow Uncertainty for Underground Leaks

Lamb et al. ran a series of controlled experiments to assess the measurement accuracy of the enclosure method for underground leak measurements in SI Table S.B.1 of Lamb et al., 2015. In this experiment, measurements were made using a variety of surfaces and ground covers using natural gas flow rates measured using a mass flow controller. For conditions in this study, we utilize only measurements made on grass as the closest analogy to field conditions. Using the eight measurements provided, a bootstrap uncertainty was performed ( trials) on the slope of measured versus actual data: 0.96 (0.93 to 1.02) or +2%/-7% (95% CI). This uncertainty is swamped by the uncertainty in the frequency of leak counts, and was not modeled in the results.

# Measurement & Modeling Methods

## Measurement Methods

When auxiliary equipment was encountered on the ROW, the study team screened the equipment using a Heath, Inc. RMLD® to locate and isolate emissions from joints or valves. After determining which component exhibited a methane emission the measurement contractor would use the high-flow instrument to measure the emission. High-flow measurements were performed using either a bag or cone enclosure to capture all emissions. Operators also collected background methane concentration, methane concentration in air passing through the instrument, and total mass flow through the instrument. These measurements were utilized to calculate the methane emission rate from the emission source.

The underground emission was first isolated utilizing the RMLD and the methane analyzer. The team placed an enclosure (commonly called a flux chamber) over the emission source (a hole in the ground as described in the main paper) and measured the emission rate utilizing the instruments in Table SI. After measurement, the operator immediately initiated efforts to repair the leak.

## Model Methods

Monte Carlo simulation was utilized to propagate both variability and uncertainty for all emissions estimates. Data flow is outlined in Figure S11. In brief, the Monte Carlo methods utilized empirical distributions for both activity counts and emissions flow rates. Emissions were estimated using 10,000 iterations, drawing an estimate from each distribution on each iteration. Confidence intervals were determined empirically from the simulation results using the pctile() function of MatLab™.


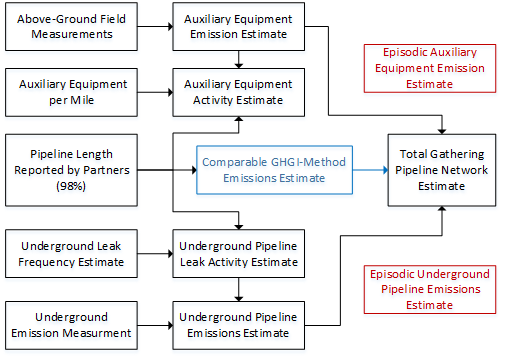


Figure S: Data flow in simulation model.

## Gathering Pipeline Emissions

### Pipeline Activity Count

Pipeline lengths and material type were provided by three partner companies in the basin. The best information available indicates that these three companies operate all gathering systems in the study area – i.e. smaller production companies that operate wells do not appear to operate any substantial length of gathering pipeline. We therefore assume that reported pipeline length represent all pipelines in the study area.

### Modeling Emission Rate from Underground Pipeline Leaks

Pipeline emissions factors were based directly upon the single underground leak measured during the field campaign. To approximate uncertainty associated with the emission rate, a lognormal distribution was utilized. To develop parameters for the distribution, a lognormal distribution was fitted to distribution mains from Lamb et al. (2015) making the assumption that the distribution of leak rates from gathering lines would most closely resemble that of distribution mains. Distribution fitting was performed using fitdist() in MatLab™ 2017a. The result, shown in Figure S12a as a standard probability plot, illustrates a strong fit, although the tail of the distribution is somewhat under-represented. This approximation is warranted, however, because very large leaks would likely be detected by operators soon after they started.

The emission distribution for this study was then developed by setting the mean of the distribution to the emissions from the single pipeline leak measured in this study and the standard deviation to the same relative size as that of the Lamb data. In terms of equations:

where the *‘dist’* subscript indicates the resulting emissions distribution and the *‘l’* subscript indicates data from the distribution study, and the letters *m & s* refer to the mean and standard deviation of the distribution, respectively, to distinguish them from the parameters of the lognormal distribution. Parameters for the distributions are summarized in Table S2.

Table S: Parameters for Pipeline Leak Emissions Distribution

| Parameter | Parameter ID | Distribution Mains Data | Emissions Distribution Utilized in Study |
| --- | --- | --- | --- |
| Mean |  | 2.14 scfh* | 4.00 kg/h |
| Standard Deviation |  | 10.2 scfh* | 19.0 kg/h |
| Lognormal Parameters |  | -1.34 | -0.194 |
|  | 1.90 | 1.78 |
| * Standard cubic feet per hour. | | | |


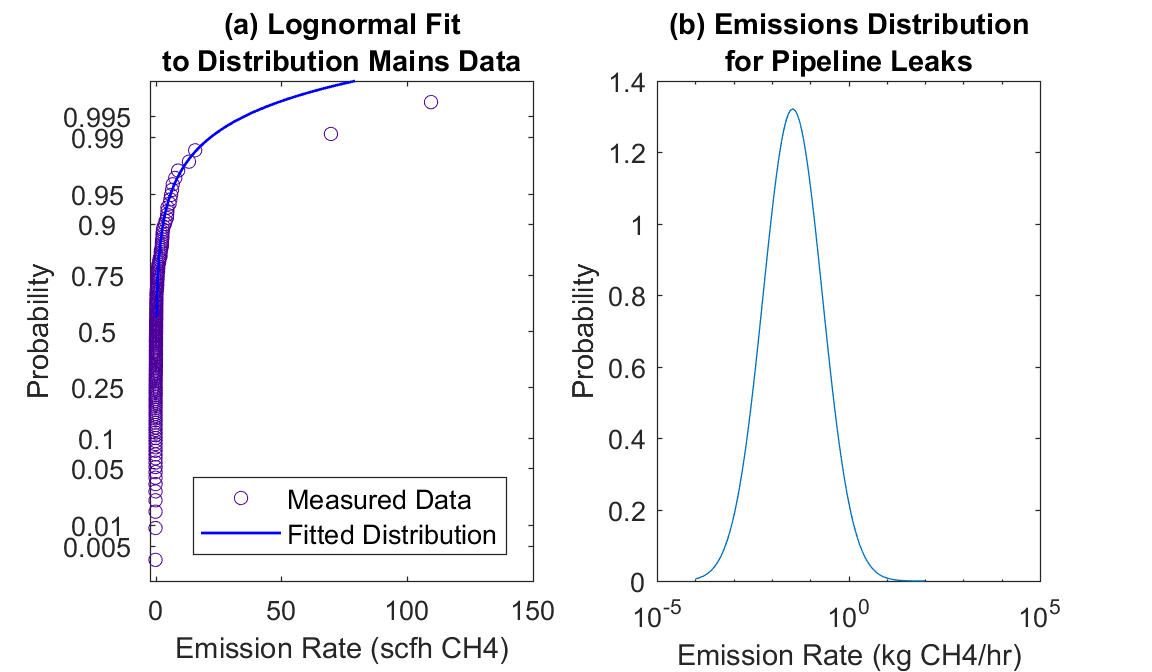


Figure S12: Development of emission rate distribution for underground pipeline leaks.

Left panel shows the fit of pipeline leak data for distribution mains from Lamb et al. to a lognormal distribution. Right panel shows the resulting emissions distribution utilized for the simulation model.

To check the impact of the lognormal assumption, a triangular distribution was also utilized to model the emission rate from pipeline leaks. Previous studies measuring distribution mains have found multiple pipeline leaks, but all of them are smaller than the pipeline leak found in this campaign. From this observation, we hypothesize that many leaks may be smaller than the leak measured here, and set the lower bound of the triangular distribution to 0 kg/h. To maintain the same mean value as measured in the field campaign, the upper bound was then set to twice the leak rate observed in the field campaign, which allows for leaks which are up to twice the emission rate of the observed leak. In this analysis we assume that very large leaks would be more readily identified and fixed by operator teams.

Comparing total emissions from the lognormal versus triangular distribution, both distributions have the same mean emission rate and therefore estimate the same mean total emissions of ≈ 402 kg CH4/hr. However, the lognormal distribution produces somewhat wider 95% confidence intervals for pipeline leaks (+163% / -81%) than the triangular distribution (+123% / -70%). For the study results, we selected the more conservative model – i.e. the one with higher uncertainty.

### Modeling the Frequency of Underground Pipeline Leaks

The field study identified one pipeline leak while measuring 96 km of gathering pipeline sampled from 3948 km of pipeline accessible for measurement. The probability of finding events when drawing samples from a total population of that contains total events, is represented by a hypergeometric distribution:

Where

- is the probability of finding leaks in the field campaign if the population of pipelines contained total leaks. For this study, , and is unknown.
- is the population from which sample was drawn, i.e. the pipeline length operated by study partners who provided access for measurement.
- is the sample size, i.e. the length of pipeline measured during the field campaign.
- is the binomial coefficient – i.e. number of ways to draw items from a set of items.

By assuming a range for – the unknown number of leaks within the study population – it is possible to calculate the probability of the result seen in the field study for all possible leak populations. If we assume pipeline is measured in steps of one kilometer (this assumption converts a continuous problem into a discrete approximation), and calculate the probability for leaks in the study partner’s pipelines, and then normalize the resulting probability population to unity, we arrive at the probability distribution shown in Figure 3 of the main paper. Note that this analysis is similar to that of the Wilson score interval with a known, finite population size. Calculations were performed using the hygepdf() function in MatLab™, as indicated below:

% Npop - Study population

% Nfield - Size of the field campaign

% Nmeas - Number of non-zero measurements found

% Calculate maximum in leak population that could drive Nmeas

NpopRange = Npop - Nfield + Nmeas;

% Compute hypergeometric distribution for the range

probFound = hygepdf(Nmeas,Npop,0:NpopRange,Nfield);

% Normalized, since we did find Nmeas leaks, one possible leak population

% must be correct

probFound = probFound/sum(probFound); % PDF Y axis

popProb = (0:NpopRange)/NpopRange; % PDF X axis

Additional notes:

- The distribution is highly skewed for small sample sizes and rare leaks – i.e. both small sample size and the infrequency of leak detections contribute to uncertainty. Skew decreases as these two parameters increase.
- The method assumes that all “true” leak populations are equally probable.

## Auxiliary Equipment Counts and Emission Rates

Available data for the auxiliary equipment counts are summarized in Table 1 of the main paper. Where missing, bootstrap methods were utilized to estimate facility counts, using as a basis auxiliary equipment counts estimated from satellite imagery. The same process was utilized for both pig launchers or block valves. Nine sections of ROW were selected for analysis. Sections are shown in Figure S13 and included 3 belonging to the partner who reported component counts. Sections varied in length from 32 to 48 km. Moving along the pipeline, an analyst counted the number of pigging or blocking valve locations visible from satellite imagery.

Collected data are shown in Figure S14. The frequency of pig launchers and block valves were essentially ( uniformly distributed, with block valves ranging from 0.06 to 0.38 locations per kilometer of pipeline, and pig launchers from 0.15 to 0.64 locations per kilometer of pipeline. Counts from the 9 sections were bootstrapped to create a probability distribution for counts of auxiliary equipment for partners and non-partners. The resulting distribution is provided in the accompanying data tables, in the worksheet “Sheet2 Activity Data.”


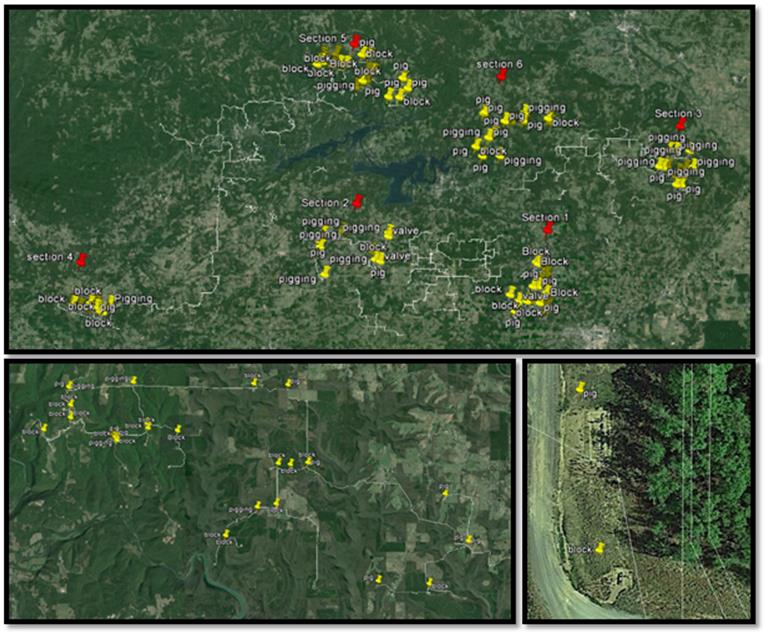


Figure S: Satellite image surveys to determine auxiliary equipment counts.

Top image displays 6 sections of viewed pipeline, bottom left shows zoomed in image of section 6 and the bottom right shows what pig launchers and block valves look like in satellite imaging.

Figure S: Cumulative distribution functions for block valves and pig launcher locations

Emission rates for the auxiliary equipment were randomly drawn exclusively from data measured in the field campaign. All emissions from each auxiliary equipment location in the field study were summed to create a distribution of emissions *by location type.* Data are in “Gathering Pipeline SM Data.xlsx”.

## Planned Episodic Emissions

No pipelines were blown down (or ruptured) during the study period. Therefore, planned episodic emissions in this study are only composed of pig launching and receiving. During the field campaign there were 13 pigging operations. Dimensions of vessels and pressures were provided by partner companies. Calculating the total mass of methane released was performed using the following method.

Where

- = volume of pig launcher/receiver
  - = Barrel length
  - = Barrel diameter
  - = Bypass length
  - = Bypass diameter
- = mass of methane in the pig launcher or receiver when pressurized, in grams
  - = Pressure provided by partner before purge
  - = Gas constant, 8.3145 *m3*Pa*K-1*mol-1*
  - = Temperature of gas at release
  - = Conversion from moles to mass. for methane.

An example of a pig launcher blowdown is shown in Figure S15 to illustrate the instantaneous emissions rate during the operation.


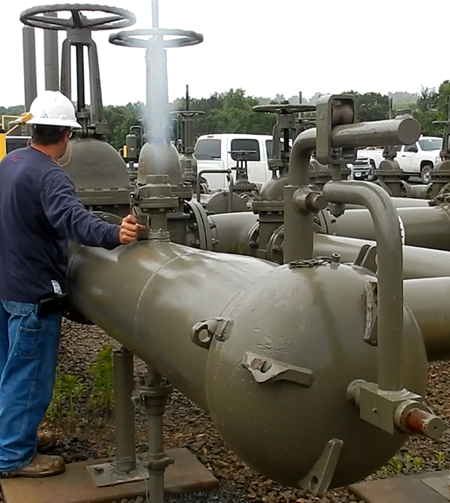


Figure S: Venting of pig launcher chamber

Table S: Dates and Sizes of Pig Launcher Emissions

| Location | Date | Mass Released (kg CH4) | Total Mass  Released (kg CH4) |
| --- | --- | --- | --- |
| Pig Facility 1 | 10/6/2015 | 1.6 | 9.3 |
| Pig Facility 2 | 2.1 |
| Pig Facility 3 | 3.2 |
| Pig Facility 4 | 2.3 |
| Pig Facility 5 | 10/7/2015 | 2.6 | 9.1 |
| Pig Facility 6 | 3.9 |
| Pig Facility 7 | 2.6 |
| Pig Facility 8 | 10/13/2015 | 1.1 | 2.0 |
| Pig Facility 9 | 0.9 |
| Pig Facility 10 | 10/14/2015 | 2.5 | 10.5 |
| Pig Facility 11 | 2.9 |
| Pig Facility 12 | 2.2 |
| Pig Facility 13 | 2.8 |

## Calculation of Comparable Estimates

**GHGI Estimates**

The 2015 GHGI sinks and sources report, released in 2016 (US EPA GHGI, n.d.), uses emission factors that were measured or calculated in a GRI/EPA 1992 field campaign and reported in 1996 (GRI/EPA, 1996). The GRI/EPA study generated emission factor and activity factor estimates for gathering pipelines for different pipeline types based upon measurements performed on distribution network pipelines. Figure S16 was pulled directly from the GRI/EPA report (GRI/EPA, 1996) and provides emission factors, activity factors and 90% CI’s for different line types.


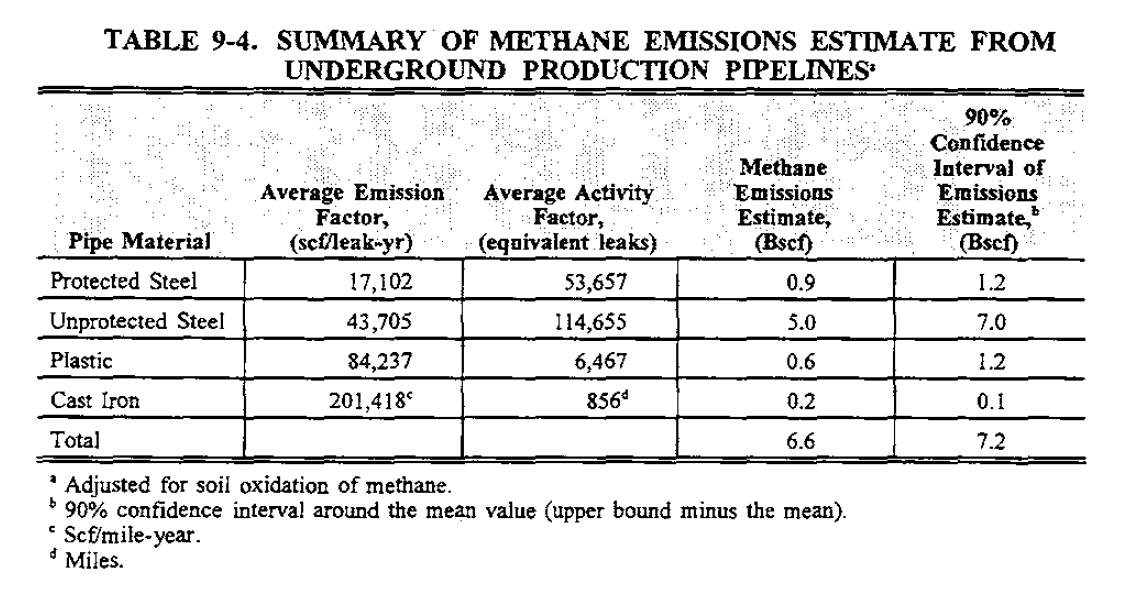


Figure S: Scanned table from the GRI/EPA study report (GRI/EPA, 1996).

The report indicated that the emission distributions were log-normal, but did not provide standard deviation, and original data could not be acquired. The model values were estimated by assuming a log-normal distribution, and estimating parameters of the distribution using Nelder-Mead optimization (MatLab™) determine the standard deviation that would produce a similar 90% CI. Figure S17 provides an example of the re-constructed lognormal distribution for plastic pipeline emissions.

Figure S: Estimated lognormal distribution of emission rates from plastic pipelines.

**GHGRP Estimates**

The Greenhouse Gas Reporting Program provides emission factors for pipelines on a per mile basis as seen in Table 4 (US CFR, n.d.). The GHGRP does not supply CI’s, standard deviations or supporting data to put uncertainty bounds on the emission factors.

Table S: GHGRP Gathering Pipeline Emission Factors

| Pipeline Material | Emission Factor  (scfh/hr/mile) |
| --- | --- |
| Protected Steel | 0.47 |
| Unprotected Steel | 16.59 |
| Plastic/Composite | 2.50 |
| Cast Iron | 27.60 |

**Lamb Study Estimates**

The Lamb study provided national estimates for emission factors from distribution pipeline mains, 95% CIs from bootstrap and identifies the best distributions to characterize the data. These values were used to generate similar distributions with the same mean and upper 95% CI. Emission factors per mile of pipe were estimated by dividing the total national emissions for each pipeline type by national pipeline lengths for each line type. See Lamb Study SI Table S4.6 for U.S. pipeline mileage, see Table S3.4 for emission distribution types and Lamb Study Table 4 for overall emission inventory for U.S. natural gas distribution systems.

# Results & Study Comparisons

Cumulative distribution functions (CDF) for measurements made on pig launchers and block valves are shown in Figure S18, and complete data are included in the SI data table “Gathering Pipeline SM Data.xlsx”. Lower Detection Limit (LDL) of the high-flow instrument is shown in the plots.

Figure S: CDF's for pig launcher & block valve emissions

Zeroes in the CDFs represent measurements of rates below the lower detection limit (LDL) of the high-flow instrument. There are some non-zero measurements below the LDL because the study team was able reduce the LDL by reducing the flow rate of the high-flow instrument under some conditions; slowing air throughput increases methane concentration, allowing methane quantification at lower leak rates. The study team made the decision to restrict airflow on a case-by-case basis, based upon prior experience. Quality control after the field campaign determined if the restricted airflow measurements could be utilized; otherwise the measurements were considered zero emissions. A table of measured emission values for pig launchers, block valves and the single line pipeline emission can be seen in Gathering Pipeline SM Data.xlsx.

Using a both a two-sided Kolmogorov-Smirnov test and a Student-t test there is no statistical difference between emissions from the two partner companies. Measurements from both companies were combined, and were also utilized to estimate emissions from non-partner auxiliary equipment.

Table S5 includes additional simulation results that are utilized in the main paper, or may be of general interest.

Table S: Summary of simulation model results

# Estimating required size of gathering pipeline measurement campaigns

The uncertainty in the SME is largely driven by the unknown frequency of underground pipeline leaks. We estimate this uncertainty following the method of Section 4.3.3, above, for a range of possible leak frequencies in a study area of similar size to this study area.

The method utilized for Figure 5 in the paper is as follows:

1. Estimate a leak frequency for the study area using prior data.
2. Assume a fraction of the basin surveyed to detect leaks.
3. Using (1) and (2), calculate the upper confidence interval using the method in Section 4.3.3. For this analysis, we are interested in only the upper confidence bound, to focus on the probability of underestimating emissions from pipeline leaks. We therefore utilize a 0/95% confidence interval, which provides a 95% confidence that the real emission rate is less than or equal to the estimated emission rate.
4. Repeat (1)-(3) for the full range of leak frequencies and survey fractions.

The result is a curve for each assumed leak frequency which estimates the 95% upper bound on estimated emissions for any given field campaign, as shown in Figure S19. As indicated in the figure, a larger portion of basins (study areas) with low leak frequencies must be surveyed to produce the same *relative* upper confidence bound as basins with high leak frequencies.


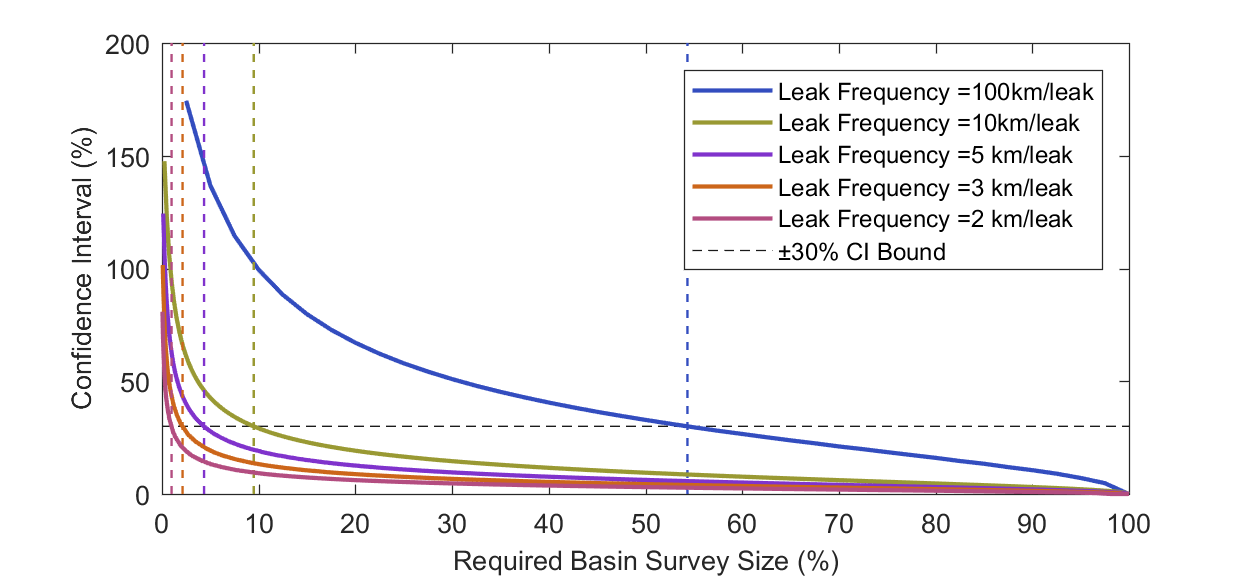


Figure S19: Required survey size for ±30% confidence bound.

Relationship between survey size and upper confidence bound in a basin similar in size to the study area. Estimates consider only the impact of leak frequency within the basin. The fraction of the basin which must be surveyed increases as leaks become less frequent, ranging from ≈1% of the basin for 1 km/leak to 65% of the basin for 160 km/leak.

However, a more relevant metric to design a leak measurement campaign is to look at pipeline emissions uncertainty relative to total emissions in the basin. To do this analysis, we assume that total emissions in the study area will be similar to Peischl et al.’s (2015) measurement of the eastern Fayetteville shale, and ask the question: How much of the basin need we measure before we can bound the pipeline emissions to be within estimated with an error ≤1% of total basin emissions? The 1% bound is arbitrary and the analysis could be repeated for a different percentage.

This analysis is completed by the following algorithm for each leak rate :

1. Compute the upper bound on pipeline emissions, , for the basin using the number of leaks computed from the curves in Figure S19 and assuming a conservative (i.e. likely high) emission rate of 4 kg/h per leak. Note that is a function of the measured fraction of the basin, , i.e. .
2. Compute the “assumed real” total pipeline emissions, , for the basin by multiplying the assumed emission rate (4 kg/h) by the assumed total number of leaks in the basin (e.g. )
3. Determining the fraction of the basin which must be measured for . This area is shaded in Figure 5 of the main paper.

# References

GRI/EPA. 1996. Methane Emissions from the Natural Gas Industry Volume 9: Underground Pipelines.

Lamb BK, Edburg SL, Ferrara TW, Howard T, Harrison MR, Kolb CE, Townsend-Small A, Dyck W, Possolo A, Whetstone JR. 2015. Direct Measurements Show Decreasing Methane Emissions from Natural Gas Local Distribution Systems in the United States. *Environ Sci Technol* **49**(8): 5161–5169. doi: 10.1021/es505116p

Peischl J, Ryerson TB, Aikin KC, de Gouw JA, Gilman JB, Holloway JS, Lerner BM, Nadkarni R, Neuman JA, Nowak JB, et al. 2015. Quantifying atmospheric methane emissions from the Haynesville, Fayetteville, and northeastern Marcellus shale gas production regions. *J Geophys Res Atmospheres* **120**(5): 2014JD022697. doi: 10.1002/2014JD022697

US CFR. n.d. 40 CFR Appendix Table W-1A to Subpart W of Part 98, Default Whole Gas Emission Factors for Onshore Petroleum and Natural Gas Production Facilities and Onshore Petroleum and Natural Gas Gathering and Boosting Facilities. LII / Legal Information Institute. Available at https://www.law.cornell.edu/cfr/text/40/appendix-Table_W-1A_to_subpart_W_of_part_98. Accessed 2017 Sep 24.

US EPA GHGI CCD. n.d. U.S. Greenhouse Gas Inventory Report. Available at https://www3.epa.gov/climatechange/ghgemissions/usinventoryreport.html. Accessed 2016 Jun 13.
