# Supplementary material for: Gathering pipeline methane emissions in Fayetteville shale pipelines and scoping guidelines for future pipeline measurement campaigns
Source: Oxford University Press journal article supplement (doi:10.1525/elementa.258), 2017-01-01
Supplement: elementa-5-258-s2.xlsx [file elementa-5-258-s2.xlsx]

## Sheet: Sheet1 Measured Emissions
GHD ID	Date	Gathering Sampling Information Comments	Screen Value (ppm)	Leak Location	Leak Rate (scfm)	Leak Rate (g CH4/hr)	Facility Total Leak Rate (g CH4/hr)							Pig Station (g CH4/hr)	Block Valve (g CH4/hr)	Underground Pipeline Leak (g CH4/hr)	Parnter 1 (g CH4/hr)	Partner 2 (g CH4/hr)
GHDGAT001	2015-09-28	Pig Station	500	F	0.002	2.304	2.304						1	170.889	20.6258	3998.84	77.5224	170.889
GHDGAT002	2015-09-28	Block Valve	0		0	0	0						2	105.764	19.9275		37.9507	105.764
GHDGAT003	2015-09-28	Pig Station	0		0	0	0		Emissions Summary				3	94.7236	8.83454		27.8819	94.7236
GHDGAT004	2015-09-28	Block Valve	0		0	0	0		F	28.5982	0.0345963		4	77.5224	4.82704		21.3825	28.405
GHDGAT005	2015-09-29	Pig Station	17500	V	0.0918091	105.764	105.764		V	401.009	0.485114		5	37.9507	4.608		21.3048	20.6258
GHDGAT006		Pig Station	6000	V	0.00192706	2.21997	4.52397		D	391.195	0.473242		6	28.405	3.52167		9.13835	19.9275
			1500	D	0.002	2.304			G	5.82567	0.0070475		7	27.8819	2.304		7.53894	17.8206
GHDGAT007		Block Valve	0		0	0	0		TOTAL	826.628	1		8	21.3825	2.304		6.912	17.8108
GHDGAT008		Pig Station	0		0	0	0						9	21.3048	2.304		4.608	10.3407
GHDGAT009	2015-09-30	Pig Station	0		0	0	0						10	17.8206	2.304		3.26552	9.216
GHDGAT010		Block Valve	0		0	0	0		Leak Locations				11	17.8108	2.304		3.25425	8.83454
GHDGAT011		Pig Station	0		0	0	0		F	12	0.122449		12	10.3407	2.304		2.81267	6.912
GHDGAT012		Block Valve	0		0	0	0		V	71	0.72449		13	9.216	2.304		2.304	4.82704
GHDGAT013		Pig Station	4000	V	0.00793259	9.13835	9.13835		D	13	0.132653		14	9.13835	2.304		2.304	4.608
GHDGAT014		Pig Station	4000	V	0.000338423	0.389864	0.389864		G	2	0.0204082		15	7.53894	2.304		2.304	4.608
GHDGAT015		Pig Station	4000	V	0.0612937	70.6104	77.5224		TOTAL	98	1		16	6.912	0.814575		2.304	4.608
			800	F	0.002	2.304							17	6.912	0.726737		0.726737	4.608
			500	F	0.002	2.304			Codes:				18	4.608	0		0.389864	4.608
			600	V	0.002	2.304			F = Flange				19	4.608	0		0.374488	4.52397
GHDGAT016		Pig Station	10000+	D	0.0329433	37.9507	37.9507		V = Valve packing				20	4.608	0		0	4.05929
GHDGAT017		Pig Station	10000+	V	0.00283465	3.26552	3.26552		D = Door				21	4.608	0		0	3.86003
GHDGAT018		Pig Station	0		0	0	0		G = Pressure gauge				22	4.608	0		0	3.52167
GHDGAT019		Pig Station	10000+	V	0.000325077	0.374488	0.374488						23	4.52397	0		0	2.304
GHDGAT020		Block Valve	10000+	V	0.000630848	0.726737	0.726737						24	4.05929	0		0	2.304
GHDGAT021		Pig Station	0		0	0	0						25	3.86003	0		0	2.304
GHDGAT022		Pig Station	5600	V	0.00244155	2.81267	2.81267						26	3.26552	0		0	2.304
GHDGAT023	2015-10-01	Block Valve	0.36	V	0.00419014	4.82704	4.82704						27	3.25425	0		0	2.304
GHDGAT024		Block Valve	10000+	V	0.000707096	0.814575	0.814575						28	2.81267	0		0	2.304
GHDGAT025		Pig Station	10000+	V	0.000956705	1.10212	1.10212						29	2.304	0		0	2.304
GHDGAT026		Pig Station	0		0	0	0						30	2.304	0		0	2.304
GHDGAT027		Pig Station	0		0	0	0						31	2.304	0		0	2.304
GHDGAT028		Block Valve	0		0	0	0						32	2.304	0		0	2.304
GHDGAT029		Pig Station	10000+	V	0.000668972	0.770656	0.770656						33	2.304	0		0	2.304
GHDGAT030		Pig Station	10000+	D	0.148341	170.889	170.889						34	2.304	0		0	2.304
GHDGAT031	2015-10-02	Block Valve	1000	V	0.002	2.304	2.304						35	2.304	0		0	2.304
GHDGAT032		Block Valve	7500	V	0	0	0						36	2.304	0		0	2.304
GHDGAT033		Underground Pipeline Leak	10000+		3.47121	3998.84	3998.84						37	2.304	0		0	2.304
GHDGAT034		Pig Station	650	V	0.002	2.304	4.608						38	2.304	0		0	1.10212
			2400	V	0.002	2.304							39	1.10212	0		0	0.814575
GHDGAT035		Pig Station	900	D	0.002	2.304	4.608						40	0.770656			0	0.770656
			100	F	0.002	2.304							41	0.389864			0	0
GHDGAT036		Pig Station	550	V	0.002	2.304	6.912						42	0.374488			0	0
			2900	V	0.002	2.304							43	0			0	0
			155	G	0.002	2.304							44	0			0	0
GHDGAT037	2015-10-05	Block Valve	30	V	0.002	2.304	2.304						45	0			0	0
GHDGAT038		Pig Station	150	V	0.002	2.304	2.304						46	0			0	0
GHDGAT039		Pig Station	200	V	0.002	2.304	9.216						47	0			0	0
			30	F	0.002	2.304							48	0			0	0
			45	F	0.002	2.304							49	0				0
			51	F	0.002	2.304							50	0				0
GHDGAT040		Block Valve	8000	V	0.00929815	10.7115	19.9275						51	0				0
			700	V	0.002	2.304							52	0				0
			5000	V	0.002	2.304							53	0				0
			60	V	0.002	2.304							54	0				0
			2200	V	0.002	2.304							55	0				0
GHDGAT041		Block Valve	0		0	0	0						56	0				0
GHDGAT042		Pig Station	44	V	0.002	2.304	2.304						57					0
GHDGAT043		Pig Station	1800	V	0.002	2.304	2.304						58					0
GHDGAT044		Pig Station	18000	V	0.0154693	17.8206	17.8206						59					0
GHDGAT045		Pig Station	6500	V	0.002	2.304	2.304						60					0
GHDGAT046		Block Valve	370	V	0.002	2.304	2.304						61					0
GHDGAT047		Block Valve	0		0	0	0						62					0
GHDGAT048		Block Valve	32000	V	0.0159044	18.3218	20.6258						63					0
			160	V	0.002	2.304							64					0
GHDGAT049	2015-10-06	Pig Station	13000	D	0.0762253	87.8116	94.7236						65					0
			700	V	0.002	2.304							66					0
			2000	V	0.002	2.304							67					0
			200	V	0.002	2.304							68					0
GHDGAT050		Pig Station	18000	D	0.00135072	1.55603	3.86003						69					0
			7000	V	0.002	2.304							70					0
GHDGAT051		Pig Station	13000	D	0.0134608	15.5068	17.8108						71					0
			6000	V	0.002	2.304							72					0
GHDGAT052		Pig Station	22000	V	0.00297633	3.42873	10.3407						73					0
			300	V	0.002	2.304							74					0
			200	V	0.002	2.304							75					0
			200	V	0.002	2.304							76					0
GHDGAT053		Block Valve	120	V	0.002	2.304	2.304						77					0
GHDGAT054		Block Valve	0		0	0	0						78					0
GHDGAT055		Pig Station	11000	V	0.00152369	1.75529	4.05929						79					0
			800	V	0.002	2.304							80					0
GHDGAT056		Block Valve	5000	F	0.002	2.304	2.304						81					0
GHDGAT057	2015-10-07	Pig Station	10,000+	D	0.0145612	16.7745	21.3825						82					0
			200	D	0.002	2.304							83					0
			400	V	0.002	2.304							84					0
GHDGAT058		Block Valve	0		0	0	0
GHDGAT059		Block Valve	0		0	0	0
GHDGAT060		Block Valve	0		0	0	0
GHDGAT061		Pig Station	20000	D	0.0184938	21.3048	21.3048
GHDGAT062		Pig Station	1500	V	0.002	2.304	2.304
GHDGAT063		Pig Station	0		0	0	0
GHDGAT064		Block Valve	20	F	0.002	2.304	2.304
GHDGAT065		Block Valve	0		0	0	0
GHDGAT066		Block Valve	0		0	0	0
GHDGAT067		Pig Station	1000	V	0.002	2.304	2.304
GHDGAT068		Pig Station	5000	V	0.002	2.304	2.304
GHDGAT069		Pig Station	22000	V	0.00254422	2.93094	7.53894
			3700	V	0.002	2.304
			700	D	0.002	2.304
GHDGAT070		Pig Station	40000	D	0.024203	27.8819	27.8819
GHDGAT071		Block Valve	0		0	0	0
GHDGAT072		Block Valve	0		0	0	0
GHDGAT073	2015-10-08	Block Valve	4600	V	0.002	2.304	4.608
			400	V	0.002	2.304
GHDGAT074		Block Valve	0		0	0	0
GHDGAT075		Block Valve	7500	F	0.002	2.304	2.304
GHDGAT076		Pig Station	22000	V	0.0226571	26.101	28.405
			2500	V	0.002	2.304
GHDGAT077		Pig Station	650	V	0.002	2.304	4.608
			78	F	0.002	2.304
GHDGAT078		Block Valve	0		0	0	0
GHDGAT079	2015-10-09	Pig Station	1200	V	0.002	2.304	2.304
GHDGAT080		Pig Station	7500	V	0.002	2.304	4.608
			4000	V	0.002	2.304
GHDGAT081		Block Valve	0		0	0	0
GHDGAT082		Block Valve	5000	V	0.00566887	6.53054	8.83454
			280	V	0.002	2.304
GHDGAT083	2015-10-13	Block Valve	0		0	0	0
GHDGAT084		Block Valve	1200	V	0.002	2.304	2.304
GHDGAT085		Block Valve	300	V	0.002	2.304	2.304
GHDGAT086		Block Valve	12500	G	0.003057	3.52167	3.52167
GHDGAT087		Block Valve	0		0	0	0
GHDGAT088		Pig Station	1000	V	0.002	2.304	2.304
GHDGAT089	2015-10-14	Pig Station	10000+	F	0.00282487	3.25425	3.25425
GHDGAT090		Pig Station	1000	V	0.002	2.304	6.912
			2200	V	0.002	2.304
			450	V	0.002	2.304
GHDGAT091		Pig Station	10000+	V	0	0	0
GHDGAT092		Pig Station	250	V	0.002	2.304	4.608
			3000	D	0.002	2.304
GHDGAT093		Pig Station	0		0	0	0
GHDGAT094		Pig Station	0		0	0	0
GHDGAT095		Pig Station	0		0	0	0
GHDGAT096		Pig Station	0		0	0	0

## Sheet: Sheet2 Activity Data
	Plastic Pipeline Length (km)	Steel Pipeline Length(km)	Unreported (km)	Total Pipeline Length (km)	Reported Pig Launchers	Reported Block Valves	Estimated Average Pig Launchers	Estimated Average Block Valves
Partner 1	208.155	463.128	117.531	788.814	NA	NA	256.128	153.613
Partner 2	505.172	2654.28	NA	3159.46	715	NA	NA	615.269
Partner 3	735.468	NA	NA	735.468	196	1100	NA	NA
	Components scanned via satelite per km to supplement NA counts
	block/km	pig/km
Partner 2	0.0608592	0.213007
	0.292548	0.234039
	0.15335	0.15335
Partner 1	0.381861	0.42429
	0.0966666	0.348
	0.230994	0.635232
	0.157026	0.20189
	0.25601	0.243819
	0.123337	0.468681
